# Supplementary material
Source: publisher figshare collection journal article supplement (https://frontiersin.figshare.com/ndownloader/files/14577557)
Supplement: Supplementary file 1 [file 14577557]

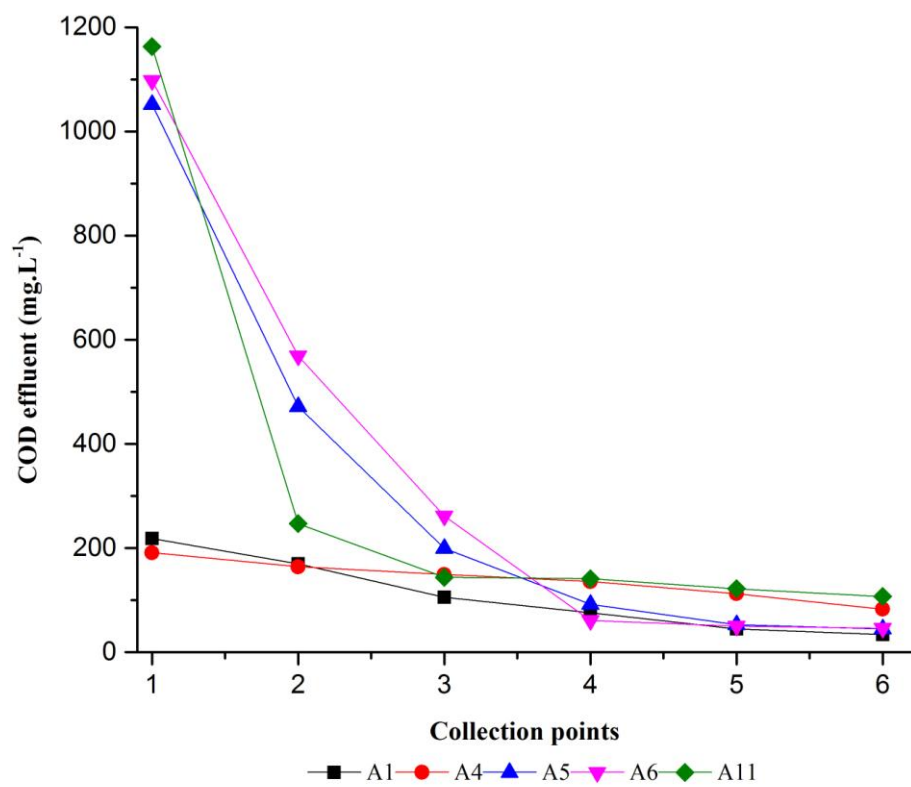

Figure S1. Degradation of organic matter along the reactor 1 (R1).

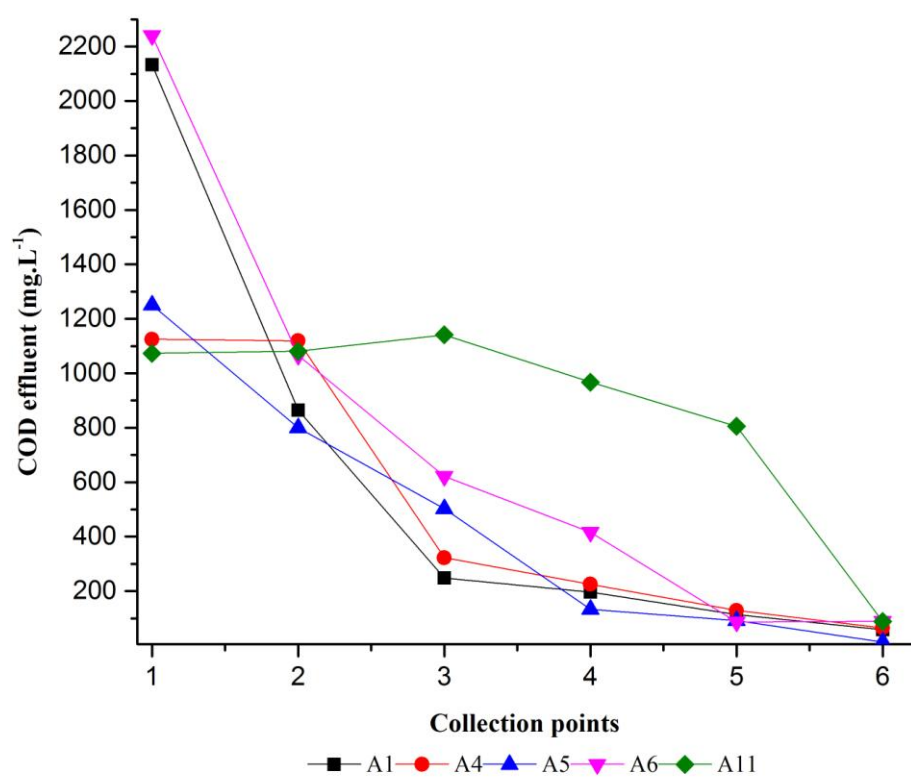

Figure S2. Degradation of organic matter along the reactor 2 (R2).
